# Supplementary material for: Plasma Vitamin C Levels: Risk Factors for Deficiency and Association with Self-Reported Functional Health in the European Prospective Investigation into Cancer-Norfolk
Source: PubMed Central journal article supplement (PMC6682997; doi:10.3390/nu11071552), 2019-07-09
Supplement: nutrients-11-01552-s001.pdf [file nutrients-11-01552-s001.pdf]

Table S1. Characteristics of EPIC Norfolk in quartiles of plasma vitamin C level.

|                                         |                         | 1.0   |             | 2.0      |              | 3.0       |             | 4.0   |             |
|-----------------------------------------|-------------------------|-------|-------------|----------|--------------|-----------|-------------|-------|-------------|
|                                         |                         | <41.0 |             | 41 -53.9 |              | 54 – 65.9 |             | ≥66   |             |
| Quartile range (mmol/l)                 |                         | 60.4  | (9.43)      | 59.1     | (9.4)        | 58.4      | (9.09)      | 58.8  | (9.15)      |
| Age (mean SD)                           |                         |       |             |          |              |           |             |       |             |
| Sex                                     | Male                    | 3,536 | (63.8)      | 2,933    | (53.8)       | 2,306     | (40.3)      | 1,492 | (25.9)      |
|                                         | Female                  | 2,007 | (36.2)      | 2,520    | (46.2)       | 3,417     | (59.7)      | 4,263 | (74.1)      |
| BMI (Median IQR)                        |                         | 26.5  | (24.3-29.0) | 26.3     | (24.1-28.79) | 25.6      | (23.6-28.1) | 25.0  | (23.0-27.3) |
| Physical functioning                    | Mean (SD)               | 74.6  | (24.9)      | 78.5     | (22.2)       | 81.4      | (20.2)      | 80.8  | (20.87)     |
| Role limitation due to physical problem | Mean (SD)               | 70.2  | (40.12)     | 75.0     | (37.4)       | 78.2      | (35.5)      | 77.7  | (35.7)      |
| Bodily pain                             | Mean (SD)               | 72.2  | (24.96)     | 73.9     | (23.01)      | 75.5      | (22.5)      | 75.1  | (22.4)      |
| Vitality                                | Mean (SD)               | 59.6  | (21)        | 61.1     | (20)         | 62.1      | (19.3)      | 62.6  | (19.5)      |
| General health                          | Mean (SD)               | 66.0  | (21.3)      | 69.0     | (19.8)       | 71.2      | (18.8)      | 71.8  | (19.1)      |
|                                         | Number (%)              |       |             |          |              |           |             |       |             |
| Smoking status                          | Current smoker          | 1155  | (21)        | 552      | (10.2)       | 445       | (7.8)       | 403   | (7.1)       |
|                                         | Former smoker           | 2483  | (45.2)      | 2414     | (44.5)       | 2331      | (41.1)      | 2233  | (39.1)      |
|                                         | Non-smoker              | 1857  | (33.8)      | 2455     | (45.3)       | 2897      | (51.1)      | 3076  | (53.9)      |
| Physical activity                       | Inactive                | 2101  | (37.9)      | 1638     | (30)         | 1576      | (27.5)      | 1466  | (25.5)      |
|                                         | Moderately inactive     | 1423  | (25.7)      | 1560     | (28.6)       | 1695      | (29.6)      | 1742  | (30.3)      |
|                                         | Moderately active       | 1145  | (20.7)      | 1248     | (22.9)       | 1337      | (23.4)      | 1398  | (24.3)      |
|                                         | Active                  | 874   | (15.8)      | 1006     | (18.5)       | 1115      | (19.5)      | 1149  | (20)        |
| Alcohol intake                          | None                    | 1196  | (22.5)      | 986      | (18.7)       | 1067      | (19.2)      | 1014  | (18.1)      |
|                                         | 1 - ≤7 units a week     | 2433  | (45.7)      | 2409     | (45.6)       | 2560      | (46.1)      | 2619  | (46.8)      |
|                                         | >7 - ≤14 units a week   | 884   | (16.6)      | 1073     | (20.3)       | 1136      | (20.5)      | 1121  | (20)        |
| Townsend score                          | >14 units a week        | 812   | (15.2)      | 811      | (15.4)       | 791       | (14.2)      | 843   | (15.1)      |
|                                         | Least deprived (<-3.82) | 980   | (17.7)      | 1042     | (19.2)       | 1216      | (21.3)      | 1210  | (21.1)      |
|                                         | 2 (-3.82 to -2.96)      | 1023  | (18.5)      | 1119     | (20.6)       | 1176      | (20.6)      | 1175  | (20.5)      |
|                                         | 3 (-2.96 to -2.16)      | 1073  | (19.4)      | 1111     | (20.5)       | 1159      | (20.3)      | 1103  | (19.3)      |
|                                         | 4 (-2.16 to -0.74)      | 1141  | (20.6)      | 1129     | (20.8)       | 1089      | (19.1)      | 1127  | (19.7)      |
| Education below                         | Most deprived (>-0.74)  | 1309  | (23.7)      | 1026     | (18.9)       | 1063      | (18.6)      | 1113  | (19.4)      |
|                                         | Lower than O level      | 2921  | (52.7)      | 2561     | (47)         | 2492      | (43.6)      | 2563  | (44.5)      |

|                                   |                          |      |        |      |        |      |        |      |        |
|-----------------------------------|--------------------------|------|--------|------|--------|------|--------|------|--------|
|                                   | A-level or above         | 2621 | (47.3) | 2887 | (53)   | 3227 | (56.4) | 3191 | (55.5) |
| Self-reported - Prevalent illness | Cerebrovascular incident | 122  | (2.2)  | 74   | (1.4)  | 54   | (0.9)  | 60   | (1)    |
|                                   | Myocardial infarction    | 275  | (5)    | 179  | (3.3)  | 141  | (2.5)  | 101  | (1.8)  |
|                                   | Cancer                   | 297  | (5.4)  | 268  | (4.9)  | 272  | (4.8)  | 364  | (6.3)  |
|                                   | Diabetes mellitus        | 203  | (3.7)  | 148  | (2.7)  | 95   | (1.7)  | 58   | (1)    |
|                                   | Asthma                   | 449  | (8.1)  | 464  | (8.5)  | 479  | (8.4)  | 501  | (8.7)  |
| Vitamin C supplementation         | No supplementation       | 4011 | (72.7) | 3377 | (62.3) | 3141 | (55.2) | 2420 | (42.2) |
|                                   | Taking supplementation   | 1506 | (27.3) | 2046 | (37.7) | 2548 | (44.8) | 3313 | (57.8) |
| Social class                      | Non-manual occupations   | 2740 | (50.9) | 3159 | (59.1) | 3591 | (64)   | 3768 | (66.7) |
|                                   | Manual occupations       | 2648 | (49.1) | 2190 | (40.9) | 2020 | (36)   | 1882 | (33.3) |
| BMI                               | <25 kg/m2                | 1795 | (32.4) | 1852 | (34)   | 2387 | (41.7) | 2864 | (49.8) |
|                                   | 25-<30 kg/m2             | 2689 | (48.5) | 2659 | (48.8) | 2581 | (45.1) | 2340 | (40.7) |
|                                   | ≥30 kg/m2                | 1059 | (19.1) | 942  | (17.3) | 755  | (13.2) | 551  | (9.6)  |

Table S2. Linear regression models for the association between vitamin C and self-reported health.

|                                                                  |                         | Physical function |               | Role physical health |               | Bodily Pain |               | Vitality |               | General health |               |
|------------------------------------------------------------------|-------------------------|-------------------|---------------|----------------------|---------------|-------------|---------------|----------|---------------|----------------|---------------|
|                                                                  |                         | Beta              | 95% CI        | Beta                 | 95% CI        | Beta        | 95% CI        | Beta     | 95% CI        | Beta           | 95% CI        |
| 1 SD change in vitamin C                                         | With supplementation    | 1.35              | (1.01-1.68)   | 1.68                 | (1.07-2.30)   | 0.65        | (0.26-1.03)   | 0.99     | (0.66-1.33)   | 1.04           | (0.71-1.37)   |
|                                                                  | Without supplementation | 1.15              | (0.66-1.65)   | 0.57                 | (-0.34-1.49)  | 0.57        | (0.0048-1.13) | 0.74     | (0.26-1.22)   | 0.59           | (0.12-1.07)   |
| Spline linear regression models in those without supplementation | Vitamin C level         | 1.77              | (1.29-2.25)   | 3.5                  | (2.63-4.37)   | 1.42        | (0.87-1.98)   | 1.55     | (1.07-2.04)   | 1.73           | (1.25-2.20)   |
|                                                                  | >0                      | 0.16              | (0.094-0.23)  | 0.26                 | (0.14-0.38)   | 0.11        | (0.027-0.18)  | 0.1      | (0.031-0.17)  | 0.12           | (0.049-0.18)  |
|                                                                  | ≥40                     | -0.088            | (-0.21-0.034) | -0.13                | (-0.35-0.092) | -0.036      | (-0.18-0.11)  | -0.029   | (-0.15-0.095) | -0.01          | (-0.13-0.11)  |
|                                                                  | ≥60                     | -0.058            | (-0.18-0.062) | -0.0037              | (-0.22-0.21)  | -0.052      | (-0.19-0.088) | -0.02    | (-0.14-0.10)  | -0.095         | (-0.21-0.024) |
|                                                                  | ≥110                    | 0.37              | (-0.45-1.18)  | 0.27                 | (-1.21-1.75)  | 0.98        | (0.015-1.94)  | 0.4      | (-0.45-1.26)  | 0.59           | (-0.22-1.40)  |

\* Spline model. All models adjusted for age, sex, smoking, physical activity, alcohol intake, BMI, education status, Townsend index and previous medical history (Cancer, diabetes, MI, Asthma and CVA). All outcomes compared the bottom decile vs. all other deciles except role physical health, which was defined the comparison as the bottom quintile vs. re
